# Supplementary material for: Exploring indole derivatives as myeloid cell leukaemia-1 (Mcl-1) inhibitors with multi-QSAR approach: a novel hope in anti-cancer drug discovery
Source: Royal Society of Chemistry journal article supplement (doi:10.1039/d0nj03863f), 2020-01-01
Supplement: d0nj03863f1.pdf [file d0nj03863f1.pdf]

## Supplementary Materials

### Exploring indole derivatives as myeloid cell leukaemia-1 (Mcl-1) inhibitors with multi-QSAR approach: A novel hope in anti-cancer drug discovery

Sk. Abdul Amin<sup>1,#</sup>, Kalyan Ghosh<sup>2,#</sup>, Dipayan Mondal<sup>2</sup>, Tarun Jha<sup>1,\*</sup> and Shovanlal Gayen<sup>2,\*</sup>

<sup>1</sup>*Natural Science Laboratory, Division of Medicinal and Pharmaceutical Chemistry, Department of Pharmaceutical Technology, P. O. Box 17020, Jadavpur University, Kolkata, 700032, India.* <sup>2</sup>*Laboratory of drug design and discovery, Department of Pharmaceutical Sciences, Dr. Harisingh Gour University, Sagar, MP, India.*

#Authors have equal contribution,

**\*Corresponding authors:** T. Jha – [www.linkedin.com/in/tarun-jha-712426154](http://www.linkedin.com/in/tarun-jha-712426154)  
([tjupharm@yahoo.com](mailto:tjupharm@yahoo.com)) and S. Gayen – [www.linkedin.com/in/shovanlal-gayen-phd-39410225](http://www.linkedin.com/in/shovanlal-gayen-phd-39410225)  
([shovanlal.gayen@gmail.com](mailto:shovanlal.gayen@gmail.com))

**Table S1.** List of Mcl-1 inhibitors with their smiles and  $K_i$  value

|                                                                                     | No      | R <sub>1</sub>                                                                      | R <sub>2</sub> | R <sub>3</sub>                 | R <sub>4</sub> | $K_i$ (nM) |
|-------------------------------------------------------------------------------------|---------|-------------------------------------------------------------------------------------|----------------|--------------------------------|----------------|------------|
| 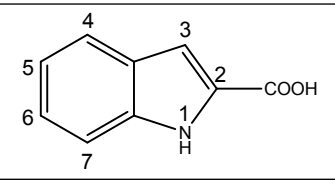   | 1       | 1-Me                                                                                | -              | -                              | -              | 160000     |
|                                                                                     | 2       | 1-Me-5-Br                                                                           | -              | -                              | -              | 810000     |
|                                                                                     | 3       | 3-Ph-7-Me                                                                           | -              | -                              | -              | 136000     |
|   | 4       | H                                                                                   | H              | Ph                             | -              | 35000      |
|                                                                                     | 5       | H                                                                                   | H              | 2-Me-Ph                        | -              | 15000      |
|                                                                                     | 6       | H                                                                                   | H              | 2-CF <sub>3</sub> -Ph          | -              | 8800       |
|                                                                                     | 7       | H                                                                                   | H              | 3-Me-Ph                        | -              | 1900       |
|                                                                                     | 8       | H                                                                                   | H              | 3-CF <sub>3</sub> -Ph          | -              | 1700       |
|                                                                                     | 9       | H                                                                                   | H              | 4-Me-Ph                        | -              | 16000      |
|                                                                                     | 10      | H                                                                                   | H              | 4-Cl-Ph                        | -              | 9800       |
|                                                                                     | 11      | H                                                                                   | H              | 4-CF <sub>3</sub> -Ph          | -              | 9900       |
|                                                                                     | 12      | H                                                                                   | H              | 3-Me-4-Cl-Ph                   | -              | 380        |
|                                                                                     | 13      | H                                                                                   | H              | 3-Et-4-Cl-Ph                   | -              | 1100       |
|                                                                                     | 14      | H                                                                                   | H              | 3,5-di-Me-4-Cl-Ph              | -              | 300        |
|                                                                                     | 15      | H                                                                                   | H              | 3-(1,1'-biphenyl)              | -              | 7700       |
|                                                                                     | 16      | H                                                                                   | H              | 4-(1,1'-biphenyl)              | -              | 7600       |
|                                                                                     | 17      | H                                                                                   | H              | 3-phenoxyphenyl                | -              | 5200       |
|                                                                                     | 18      | H                                                                                   | H              | 4-phenoxyphenyl                | -              | 6400       |
|                                                                                     | 19      | H                                                                                   | H              | 1-naphthyl                     | -              | 330        |
|                                                                                     | 20      | H                                                                                   | H              | 2-naphthyl                     | -              | 7500       |
|                                                                                     | 21      | H                                                                                   | H              | 1-(4-Cl-naphthyl)              | -              | 480        |
|                                                                                     | 22      | H                                                                                   | H              | 1-(5,6,7,8-tetrahydronaphthyl) | -              | 300        |
|                                                                                     | 23      | H                                                                                   | H              | 5-(2,3-dihydroindeny)          | -              | 2900       |
|                                                                                     | 24      | H                                                                                   | H              | 6-quinoliny                    | -              | 62000      |
|                                                                                     | 25      | H                                                                                   | H              | 4-indoly                       | -              | 14000      |
|                                                                                     | 26      | H                                                                                   | 4-Cl           | 3-Me-4-Cl-phenyl               | -              | 810        |
|                                                                                     | 27      | H                                                                                   | 4-Cl           | 3,5-di-Me-4-Cl-phenyl          | -              | 160        |
|                                                                                     | 28      | H                                                                                   | 4-Cl           | 1-naphthyl                     | -              | 700        |
|                                                                                     | 29      | H                                                                                   | 6-Cl           | 3-Me-4-Cl-phenyl               | -              | 190        |
|                                                                                     | 30      | H                                                                                   | 6-Cl           | 3,5-di-Me-4-Cl-phenyl          | -              | 55         |
|                                                                                     | 31      | H                                                                                   | 6-Cl           | 1-naphthyl                     | -              | 75         |
|                                                                                     | 32      | H                                                                                   | 6-Cl           | 1-(5,6,7,8-tetrahydronaphthyl) | -              | 66         |
|                                                                                     | 33      | Me                                                                                  | H              | 3,5-di-Me-4-Cl-phenyl          | -              | 180        |
|                                                                                     | 34      | Me                                                                                  | H              | 1-naphthyl                     | -              | 260        |
|                                                                                     | 35      | Me                                                                                  | 6-Cl           | 3,5-di-Me-4-Cl-phenyl          | -              | 140        |
|                                                                                     | 36      | Bn                                                                                  | H              | 1-naphthyl                     | -              | 290        |
|                                                                                     | 37      | Ph                                                                                  | H              | -                              | -              | 130        |
|                                                                                     | 38      | o-tolyl                                                                             | H              | -                              | -              | 35         |
| 39                                                                                  | m-tolyl | H                                                                                   | -              | -                              | 160            |            |
|  | 40      | p-tolyl                                                                             | H              | -                              | -              | 150        |
|                                                                                     |         |                                                                                     |                |                                |                |            |
|  | 41      |  | -              | -                              | -              | 21         |
|                                                                                     | 42      |  | -              | -                              | -              | 1.5        |

|  |    |                                                           |                                           |    |   |      |
|--|----|-----------------------------------------------------------|-------------------------------------------|----|---|------|
|  | 43 |                                                           | -                                         | -  | - | 2.3  |
|  | 44 |                                                           | -                                         | -  | - | 2.0  |
|  | 45 |                                                           | -                                         | -  | - | 0.24 |
|  | 46 |                                                           | -                                         | -  | - | 0.43 |
|  | 47 |                                                           | -                                         | -  | - | 0.20 |
|  | 48 |                                                           | -                                         | -  | - | 0.31 |
|  | 49 |                                                           | -                                         | -  | - | 0.45 |
|  | 50 |                                                           | -                                         | -  | - | 0.48 |
|  | 51 | Me                                                        | H                                         | -  | - | 655  |
|  | 52 | CH <sub>2</sub> CH <sub>2</sub> OPh                       | H                                         | -  | - | 322  |
|  | 53 | CH <sub>2</sub> CH <sub>2</sub> NH(C=O)Ph                 | H                                         | -  | - | 430  |
|  | 54 | CH <sub>2</sub> CH <sub>2</sub> NH(C=O)Cy                 | H                                         | -  | - | 118  |
|  | 55 | CH <sub>2</sub> CH <sub>2</sub> NH(C=O)CH <sub>2</sub> Cy | H                                         | -  | - | 1098 |
|  | 56 | CH <sub>2</sub> CH <sub>2</sub> CH <sub>2</sub> NHCy      | H                                         | -  | - | 1015 |
|  | 57 | CH <sub>2</sub> CH <sub>2</sub> NH(SO <sub>2</sub> )Cy    | H                                         | -  | - | 251  |
|  | 58 | CH <sub>2</sub> CH <sub>2</sub> NH(C=O)Me                 | H                                         | -  | - | 656  |
|  |    | 59                                                        | CH <sub>2</sub> CH <sub>2</sub> NH(C=O)Cy | Cl | - | -    |
|  | 60 |                                                           | H                                         | -  | - | 269  |
|  | 61 |                                                           | H                                         | -  | - | 278  |
|  | 62 |                                                           | H                                         | -  | - | 432  |
|  | 63 |                                                           | H                                         | -  | - | 298  |
|  | 64 |                                                           | H                                         | -  | - | 311  |

|                                                                                     |    |                                                                                     |    |   |   |     |
|-------------------------------------------------------------------------------------|----|-------------------------------------------------------------------------------------|----|---|---|-----|
|                                                                                     | 65 | 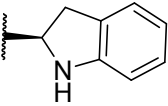   | H  | - | - | 193 |
|                                                                                     | 66 |    | Cl | - | - | 46  |
|                                                                                     | 67 |    | Cl | - | - | 28  |
|                                                                                     | 68 |    | H  | - | - | 139 |
|                                                                                     | 69 |    | H  | - | - | 148 |
|                                                                                     | 70 |    | Cl | - | - | 782 |
|                                                                                     | 71 |    | H  | - | - | 90  |
|                                                                                     | 72 |  | Cl | - | - | 53  |
|                                                                                     | 73 |  | Cl | - | - | 19  |
|                                                                                     | 74 |  | Cl | - | - | 308 |
|                                                                                     | 75 | 2-F-Ph                                                                              | H  | - | - | 336 |
|                                                                                     | 76 | 3-F-Ph                                                                              | H  | - | - | 100 |
|                                                                                     | 77 | 4-F-Ph                                                                              | H  | - | - | 117 |
|                                                                                     | 78 | 2-CF <sub>3</sub> -Ph                                                               | Cl | - | - | 18  |
|                                                                                     | 79 | 3-CF <sub>3</sub> -Ph                                                               | Cl | - | - | 79  |
|                                                                                     | 80 | 4-CF <sub>3</sub> -Ph                                                               | Cl | - | - | 119 |
|                                                                                     | 81 | Me                                                                                  | Cl | - | - | 209 |
|                                                                                     | 82 | CF <sub>3</sub>                                                                     | Cl | - | - | 116 |
|                                                                                     | 83 | Et                                                                                  | Cl | - | - | 87  |
|                                                                                     | 84 | i-Pr                                                                                | Cl | - | - | 66  |
|                                                                                     | 85 | 3-Pentyl                                                                            | Cl | - | - | 16  |
|                                                                                     | 86 | i-Bu                                                                                | Cl | - | - | 10  |
|                                                                                     | 87 | Ph                                                                                  | H  | - | - | 361 |
|                                                                                     | 88 | Ph                                                                                  | Cl | - | - | 91  |
|                                                                                     | 89 | 4-pyridyl                                                                           | H  | - | - | 335 |
|  | 90 | 1-furanyl                                                                           | Cl | - | - | 116 |

|                                                                                     |     |                                                                                   |                                                                                      |   |   |      |
|-------------------------------------------------------------------------------------|-----|-----------------------------------------------------------------------------------|--------------------------------------------------------------------------------------|---|---|------|
| 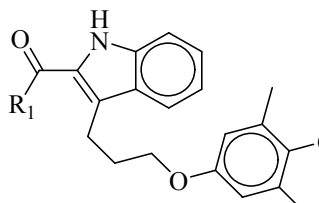   | 91  |  | -                                                                                    | - | - | 3200 |
|                                                                                     | 92  |  | -                                                                                    | - | - | 620  |
|                                                                                     | 93  |  | -                                                                                    | - | - | 570  |
|                                                                                     | 94  |  | -                                                                                    | - | - | 69   |
|  | 95  | H                                                                                 |    | - | - | 19   |
|                                                                                     | 96  | H                                                                                 |   | - | - | 72   |
|                                                                                     | 97  | Cl                                                                                |  | - | - | 20   |
|                                                                                     | 98  | H                                                                                 |  | - | - | 41   |
|                                                                                     | 99  | H                                                                                 |  | - | - | 21   |
|                                                                                     | 100 | Cl                                                                                |  | - | - | 23   |
|                                                                                     | 101 | Cl                                                                                |  | - | - | 17   |

|         |                                                                                     |                                                                                     |                                                                                      |   |   |     |
|---------|-------------------------------------------------------------------------------------|-------------------------------------------------------------------------------------|--------------------------------------------------------------------------------------|---|---|-----|
|         | 10<br>2                                                                             | Cl                                                                                  | 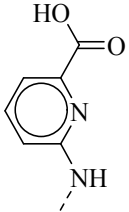   | - | - | 96  |
|         | 10<br>3                                                                             | Cl                                                                                  |    | - | - | 12  |
|         | 10<br>4                                                                             | Cl                                                                                  |    | - | - | 31  |
|         | 10<br>5                                                                             | Cl                                                                                  |    | - | - | 22  |
|         | 10<br>6                                                                             | Cl                                                                                  |  | - | - | 29  |
|         |  | 10<br>7                                                                             |   | - | - | -   |
| 10<br>8 |                                                                                     |  | -                                                                                    | - | - | 4.9 |
| 10<br>9 |                                                                                     |  | -                                                                                    | - | - | 1.1 |
| 11<br>0 |                                                                                     |  | -                                                                                    | - | - | 3.3 |
| 11<br>1 |                                                                                     |  | -                                                                                    | - | - | 2.1 |
| 11<br>2 |                                                                                     |  | -                                                                                    | - | - | 1   |
| 11<br>3 |                                                                                     |  | -                                                                                    | - | - | 1.2 |

|  |     |    |                                |        |   |        |
|--|-----|----|--------------------------------|--------|---|--------|
|  | 114 |    | -                              | -      | - | 2.4    |
|  | 115 |    | -                              | -      | - | 1.8    |
|  | 116 |    | -                              | -      | - | 1      |
|  | 117 |    | -                              | -      | - | 2.4    |
|  | 118 | H  | Me                             | S      | - | 35000  |
|  | 119 | H  | H                              | S      | - | 51000  |
|  | 120 | H  | H                              | CH2    | - | 131000 |
|  | 121 | Me | H                              | S      | - | 18000  |
|  | 122 | Me | H                              | CH2    | - | 90000  |
|  | 123 | Me | H                              | O      | - | 18000  |
|  | 124 | H  | 1-naphthyl                     | S      | 1 | 3000   |
|  | 125 | H  | 1-naphthyl                     | CH2    | 1 | 4000   |
|  | 126 | H  | 1-naphthyl                     | O      | 1 | 1600   |
|  | 127 | H  | 1-naphthyl                     | S      | 2 | 120    |
|  | 128 | H  | 1-naphthyl                     | CH2    | 2 | 310    |
|  | 129 | H  | 1-naphthyl                     | O      | 2 | 110    |
|  | 130 | H  | 1-naphthyl                     | SO2    | 2 | 88     |
|  | 131 | H  | 1-naphthyl                     | SCH2   | 2 | 170    |
|  | 132 | H  | 1-naphthyl                     | SOCH2  | 2 | 74     |
|  | 133 | H  | 1-naphthyl                     | SO2CH2 | 2 | 61     |
|  | 134 | H  | 1-(5,6,7,8-tetrahydronaphthyl) | S      | 2 | 150    |
|  | 135 | H  | 1-(4-Cl-naphthyl)              | S      | 2 | 200    |
|  | 136 | H  | 2-(5,6,7,8-tetrahydronaphthyl) | S      | 2 | 410    |
|  | 137 | H  | 3-Me-4-Cl-phenyl               | S      | 2 | 210    |
|  | 138 | H  | 3,5-di-Me-4-Cl-phenyl          | S      | 2 | 71     |
|  | 139 | H  | 3,5-di-Me-4-Cl-phenyl          | CH2    | 2 | 110    |
|  | 140 | H  | 3,5-di-Me-4-Cl-phenyl          | O      | 2 | 65     |
|  | 141 | H  | 3,5-di-Me-4-Cl-phenyl          | SCH2   | 2 | 40     |
|  | 142 | Cl | 3,5-di-Me-4-Cl-phenyl          | CH2    | 2 | 3      |
|  | 143 | Cl | 3,5-di-Me-4-Cl-phenyl          | O      | 2 | 9      |

**Table S2.** Observed (Obs) activity, activity scale (actual and estimated) of modelling set molecules calculated on the basis of HYPO-1 for Mcl-1 inhibitors

| Sl. No. | Compound | Obs (nM) | Activity scale <sup>a</sup> |           |
|---------|----------|----------|-----------------------------|-----------|
|         |          |          | Actual                      | Estimated |
| 1       | 1        | 1,60,000 | p                           | p         |
| 2       | 2        | 81,000   | p                           | p         |
| 3       | 3        | 1,36,000 | p                           | p         |
| 4       | 8        | 1,700    | p                           | p         |
| 5       | 24       | 62,000   | p                           | p         |
| 6       | 25       | 14,000   | p                           | p         |
| 7       | 27       | 160      | pp                          | pp        |
| 8       | 32       | 66       | ppp                         | ppp       |
| 9       | 34       | 260      | pp                          | p         |
| 10      | 39       | 160      | pp                          | pp        |
| 11      | 41       | 21       | ppp                         | ppp       |
| 12      | 44       | 2        | ppp                         | ppp       |
| 13      | 47       | 0.2      | ppp                         | ppp       |
| 14      | 56       | 1,015    | p                           | pp        |
| 15      | 63       | 298      | pp                          | ppp       |
| 16      | 66       | 46       | ppp                         | ppp       |
| 17      | 68       | 139      | pp                          | ppp       |
| 18      | 70       | 782      | pp                          | pp        |
| 19      | 74       | 308      | pp                          | pp        |
| 20      | 89       | 335      | pp                          | pp        |
| 21      | 91       | 3,200    | p                           | pp        |
| 22      | 95       | 19       | ppp                         | ppp       |
| 23      | 103      | 12       | ppp                         | ppp       |
| 24      | 105      | 22       | ppp                         | ppp       |
| 25      | 114      | 2.4      | ppp                         | ppp       |
| 26      | 119      | 51,000   | p                           | p         |
| 27      | 122      | 90,000   | p                           | p         |
| 28      | 125      | 4,000    | p                           | p         |
| 29      | 134      | 150      | pp                          | pp        |
| 30      | 143      | 9        | ppp                         | ppp       |

<sup>a</sup>Activity scale: ppp, <100 nM (highly active); pp, >100-1,000 nM (moderately active); p, >1,000 nM (inactive).



**Table S3.** Observed (Obs) activity, activity scale (actual and estimated) of external set molecules calculated on the basis of HYPO-1 for Mcl-1 inhibitors

| Sl. No. | Compound | Obs (nM) | Activity scale <sup>a</sup> |           |
|---------|----------|----------|-----------------------------|-----------|
|         |          |          | Actual                      | Estimated |
| 1       | 004.mol  | 35,000   | p                           | p         |
| 2       | 005.mol  | 15,000   | p                           | p         |
| 3       | 006.mol  | 8,800    | p                           | p         |
| 4       | 007.mol  | 1,900    | p                           | p         |
| 5       | 009.mol  | 16,000   | p                           | p         |
| 6       | 010.mol  | 9,800    | p                           | p         |
| 7       | 011.mol  | 9,900    | p                           | p         |
| 8       | 012.mol  | 380      | pp                          | p         |
| 9       | 013.mol  | 1,100    | p                           | p         |
| 10      | 014.mol  | 300      | pp                          | p         |
| 11      | 015.mol  | 7,700    | p                           | p         |
| 12      | 016.mol  | 7,600    | p                           | p         |
| 13      | 017.mol  | 5,200    | p                           | p         |
| 14      | 018.mol  | 6,400    | p                           | p         |
| 15      | 019.mol  | 330      | pp                          | p         |
| 16      | 020.mol  | 7,500    | p                           | p         |
| 17      | 021.mol  | 480      | pp                          | p         |
| 18      | 022.mol  | 300      | pp                          | p         |
| 19      | 023.mol  | 2,900    | p                           | p         |
| 20      | 026.mol  | 810      | pp                          | p         |
| 21      | 028.mol  | 700      | pp                          | p         |
| 22      | 029.mol  | 190      | pp                          | pp        |
| 23      | 030.mol  | 55       | ppp                         | pp        |
| 24      | 031.mol  | 75       | ppp                         | p         |
| 25      | 033.mol  | 180      | pp                          | ppp       |
| 26      | 035.mol  | 140      | pp                          | ppp       |
| 27      | 036.mol  | 290      | pp                          | pp        |
| 28      | 037.mol  | 130      | pp                          | pp        |
| 29      | 038.mol  | 35       | ppp                         | ppp       |
| 30      | 040.mol  | 150      | pp                          | pp        |
| 31      | 042.mol  | 1.5      | ppp                         | pp        |
| 32      | 043.mol  | 2.3      | ppp                         | pp        |
| 33      | 045.mol  | 0.24     | ppp                         | pp        |
| 34      | 046.mol  | 0.43     | ppp                         | ppp       |
| 35      | 048.mol  | 0.31     | ppp                         | pp        |
| 36      | 049.mol  | 0.45     | ppp                         | ppp       |
| 37      | 050.mol  | 0.48     | ppp                         | pp        |
| 38      | 051.mol  | 655      | pp                          | p         |
| 39      | 052.mol  | 322      | pp                          | pp        |

|    |         |       |     |     |
|----|---------|-------|-----|-----|
| 40 | 053.mol | 430   | pp  | pp  |
| 41 | 054.mol | 118   | pp  | pp  |
| 42 | 055.mol | 1,098 | p   | pp  |
| 43 | 057.mol | 251   | pp  | p   |
| 44 | 058.mol | 656   | pp  | pp  |
| 45 | 059.mol | 55    | ppp | pp  |
| 46 | 060.mol | 269   | pp  | ppp |
| 47 | 061.mol | 278   | pp  | pp  |
| 48 | 062.mol | 432   | pp  | ppp |
| 49 | 064.mol | 311   | pp  | p   |
| 50 | 065.mol | 193   | pp  | p   |
| 51 | 067.mol | 28    | ppp | pp  |
| 52 | 069.mol | 148   | pp  | pp  |
| 53 | 071.mol | 90    | ppp | ppp |
| 54 | 072.mol | 53    | ppp | pp  |
| 55 | 073.mol | 19    | ppp | p   |
| 56 | 075.mol | 336   | pp  | pp  |
| 57 | 076.mol | 100   | pp  | pp  |
| 58 | 077.mol | 117   | pp  | pp  |
| 59 | 078.mol | 18    | ppp | ppp |
| 60 | 079.mol | 79    | ppp | ppp |
| 61 | 080.mol | 119   | pp  | ppp |
| 62 | 081.mol | 209   | pp  | pp  |
| 63 | 082.mol | 116   | pp  | pp  |
| 64 | 083.mol | 87    | ppp | pp  |
| 65 | 084.mol | 66    | ppp | pp  |
| 66 | 085.mol | 16    | ppp | ppp |
| 67 | 086.mol | 10    | ppp | ppp |
| 68 | 087.mol | 361   | pp  | p   |
| 69 | 088.mol | 91    | ppp | pp  |
| 70 | 090.mol | 116   | pp  | pp  |
| 71 | 092.mol | 620   | pp  | p   |
| 72 | 093.mol | 570   | pp  | pp  |
| 73 | 094.mol | 69    | ppp | pp  |
| 74 | 096.mol | 72    | ppp | ppp |
| 75 | 097.mol | 20    | ppp | ppp |
| 76 | 098.mol | 41    | ppp | ppp |
| 77 | 099.mol | 21    | ppp | ppp |
| 78 | 100.mol | 23    | ppp | ppp |
| 79 | 101.mol | 17    | ppp | pp  |
| 80 | 102.mol | 96    | ppp | ppp |
| 81 | 104.mol | 31    | ppp | pp  |
| 82 | 106.mol | 29    | ppp | ppp |
| 83 | 107.mol | 2.9   | ppp | ppp |
| 84 | 108.mol | 4.9   | ppp | ppp |
| 85 | 109.mol | 1.1   | ppp | ppp |

|            |         |          |     |     |
|------------|---------|----------|-----|-----|
| <b>86</b>  | 110.mol | 3.3      | ppp | ppp |
| <b>87</b>  | 111.mol | 2.1      | ppp | ppp |
| <b>88</b>  | 112.mol | 1        | ppp | ppp |
| <b>89</b>  | 113.mol | 1.2      | ppp | ppp |
| <b>90</b>  | 115.mol | 1.8      | ppp | ppp |
| <b>91</b>  | 116.mol | 1        | ppp | ppp |
| <b>92</b>  | 117.mol | 2.4      | ppp | ppp |
| <b>93</b>  | 118.mol | 35,000   | p   | p   |
| <b>94</b>  | 120.mol | 1,31,000 | p   | p   |
| <b>95</b>  | 121.mol | 18,000   | p   | p   |
| <b>96</b>  | 123.mol | 18,000   | p   | p   |
| <b>97</b>  | 124.mol | 3,000    | p   | pp  |
| <b>98</b>  | 126.mol | 1,600    | p   | p   |
| <b>99</b>  | 127.mol | 120      | pp  | p   |
| <b>100</b> | 128.mol | 310      | pp  | pp  |
| <b>101</b> | 129.mol | 110      | pp  | pp  |
| <b>102</b> | 130.mol | 88       | ppp | p   |
| <b>103</b> | 131.mol | 170      | pp  | p   |
| <b>104</b> | 132.mol | 74       | ppp | p   |
| <b>105</b> | 133.mol | 61       | ppp | p   |
| <b>106</b> | 135.mol | 200      | pp  | ppp |
| <b>107</b> | 136.mol | 410      | pp  | p   |
| <b>108</b> | 137.mol | 210      | pp  | ppp |
| <b>109</b> | 138.mol | 71       | ppp | ppp |
| <b>110</b> | 139.mol | 110      | pp  | pp  |
| <b>111</b> | 140.mol | 65       | ppp | pp  |
| <b>112</b> | 141.mol | 40       | ppp | pp  |
| <b>113</b> | 142.mol | 3        | ppp | pp  |

<sup>a</sup>Activity scale: ppp, <100 nM (highly active); pp, >100-1,000 nM (moderately active); p, >1,000 nM (inactive).

**Table S4.** The tuning parameters used to build best individual models (GBM, RF, SVM and  $k$ NN) for Mcl-1 inhibitors.

| <b>Model</b>            | <b>Optimal parameters</b>                                                                                    | <b>Mcl-1 Dataset</b> |
|-------------------------|--------------------------------------------------------------------------------------------------------------|----------------------|
| <b>GBM</b>              | Maximum depth                                                                                                | 3                    |
|                         | Learning rate                                                                                                | 0.1                  |
|                         | Subsample                                                                                                    | 0.5                  |
|                         | Number of features                                                                                           | 0.5                  |
|                         | Number of trees                                                                                              | 400                  |
|                         | min_samples_split<br>(minimum number of samples which are required in a node to be considered for splitting) | 2                    |
|                         | min_samples_leaf<br>(minimum samples required in a terminal node or leaf)                                    | 1                    |
| <b>RF</b>               | Number of trees                                                                                              | 500                  |
|                         | Maximum features                                                                                             | 122                  |
|                         | Maximum depth                                                                                                | none                 |
|                         | min_samples_split                                                                                            | 2                    |
|                         | min_samples_leaf                                                                                             | 1                    |
| <b>SVM</b>              | $C$                                                                                                          | 1000                 |
|                         | Gama                                                                                                         | 0.001                |
|                         | Kernel                                                                                                       | rbf                  |
|                         | degree                                                                                                       | 3                    |
| <b><math>k</math>NN</b> | Leaf size                                                                                                    | 30                   |
|                         | $p$                                                                                                          | 2                    |
|                         | Number of neighbours                                                                                         | 3                    |

**Table S5.** 10 models developed using machine learning approach (OCHEM) for Mcl-1 inhibitors.

| <b>MLR (Multiple Linear Regression)</b> |              |             |                              |             |
|-----------------------------------------|--------------|-------------|------------------------------|-------------|
| <b>E-state</b>                          |              |             | <b>ISIDA fragments</b>       |             |
|                                         | <b>TRAIN</b> | <b>TEST</b> | <b>TRAIN</b>                 | <b>TEST</b> |
| <b><i>R</i><sup>2</sup></b>             | 0.83 ± 0.03  | 0.8 ± 0.05  | 0.6 ± 0.1                    | 0.83 ± 0.05 |
| <b><i>q</i><sup>2</sup></b>             | 0.83 ± 0.03  | 0.79 ± 0.06 | 0.5 ± 0.2                    | 0.78 ± 0.07 |
| <b><i>RMSE</i></b>                      | 0.54 ± 0.04  | 0.58 ± 0.06 | 0.9 ± 0.2                    | 0.6 ± 0.08  |
| <b><i>MAE</i></b>                       | 0.44 ± 0.03  | 0.48 ± 0.06 | 0.55 ± 0.07                  | 0.48 ± 0.07 |
| <b>Alogps</b>                           |              |             | <b>Inductive descriptors</b> |             |
|                                         | <b>TRAIN</b> | <b>TEST</b> | <b>TRAIN</b>                 | <b>TEST</b> |
| <b><i>R</i><sup>2</sup></b>             | 0.54 ± 0.06  | 0.4 ± 0.1   | 0.83 ± 0.03                  | 0.85 ± 0.04 |
| <b><i>q</i><sup>2</sup></b>             | 0.54 ± 0.07  | 0.4 ± 0.2   | 0.83 ± 0.03                  | 0.84 ± 0.05 |
| <b><i>RMSE</i></b>                      | 0.88 ± 0.06  | 1 ± 0.1     | 0.54 ± 0.04                  | 0.51 ± 0.06 |
| <b><i>MAE</i></b>                       | 0.69 ± 0.05  | 0.8 ± 0.1   | 0.43 ± 0.03                  | 0.41 ± 0.06 |
| <b>GSFragment</b>                       |              |             | <b>MERSY descriptors</b>     |             |
|                                         | <b>TRAIN</b> | <b>TEST</b> | <b>TRAIN</b>                 | <b>TEST</b> |
| <b><i>R</i><sup>2</sup></b>             | 0.83 ± 0.03  | 0.77 ± 0.08 | 0.35 ± 0.07                  | 0.5 ± 0.1   |
| <b><i>q</i><sup>2</sup></b>             | 0.83 ± 0.03  | 0.75 ± 0.09 | 0.33 ± 0.08                  | 0.5 ± 0.1   |
| <b><i>RMSE</i></b>                      | 0.54 ± 0.04  | 0.64 ± 0.1  | 1.07 ± 0.07                  | 0.9 ± 0.1   |
| <b><i>MAE</i></b>                       | 0.44 ± 0.03  | 0.51 ± 0.07 | 0.84 ± 0.06                  | 0.7 ± 0.09  |
| <b>CDK 2.0</b>                          |              |             | <b>QNPR</b>                  |             |
|                                         | <b>TRAIN</b> | <b>TEST</b> | <b>TRAIN</b>                 | <b>TEST</b> |
| <b><i>R</i><sup>2</sup></b>             | 0.5 ± 0.1    | 0.73 ± 0.1  | 0.81 ± 0.03                  | 0.8 ± 0.06  |
| <b><i>q</i><sup>2</sup></b>             | 0.04 ± 0.2   | 0.69 ± 0.1  | 0.81 ± 0.03                  | 0.79 ± 0.07 |
| <b><i>RMSE</i></b>                      | 1.3 ± 0.2    | 0.72 ± 0.09 | 0.57 ± 0.03                  | 0.58 ± 0.07 |
| <b><i>MAE</i></b>                       | 0.83 ± 0.09  | 0.57 ± 0.08 | 0.46 ± 0.03                  | 0.49 ± 0.06 |
| <b>Spectrophores</b>                    |              |             | <b>Structural alerts</b>     |             |
|                                         | <b>TRAIN</b> | <b>TEST</b> | <b>TRAIN</b>                 | <b>TEST</b> |
| <b><i>R</i><sup>2</sup></b>             | 0.73 ± 0.05  | 0.5 ± 0.1   | 0.81 ± 0.03                  | 0.82 ± 0.05 |
| <b><i>q</i><sup>2</sup></b>             | 0.72 ± 0.05  | 0.4 ± 0.2   | 0.81 ± 0.04                  | 0.81 ± 0.05 |
| <b><i>RMSE</i></b>                      | 0.69 ± 0.04  | 1 ± 0.1     | 0.57 ± 0.03                  | 0.56 ± 0.06 |
| <b><i>MAE</i></b>                       | 0.55 ± 0.04  | 0.8 ± 0.1   | 0.45 ± 0.03                  | 0.47 ± 0.06 |

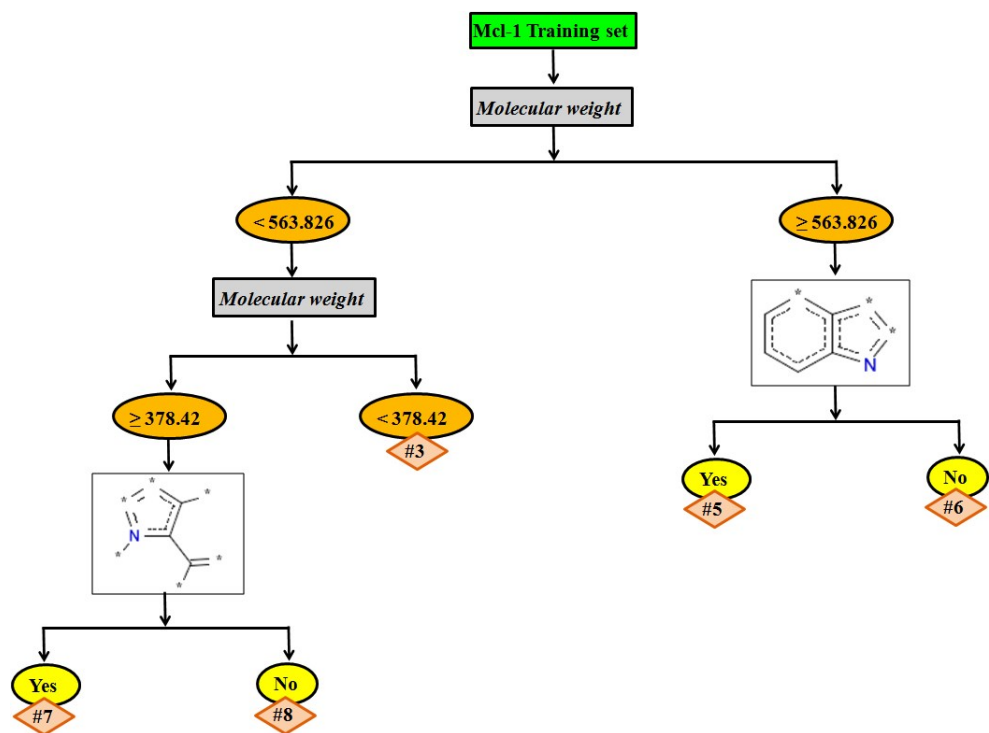

**Figure S1.** Decision tree of the best RP model for indole-based Mcl-1 inhibitors.

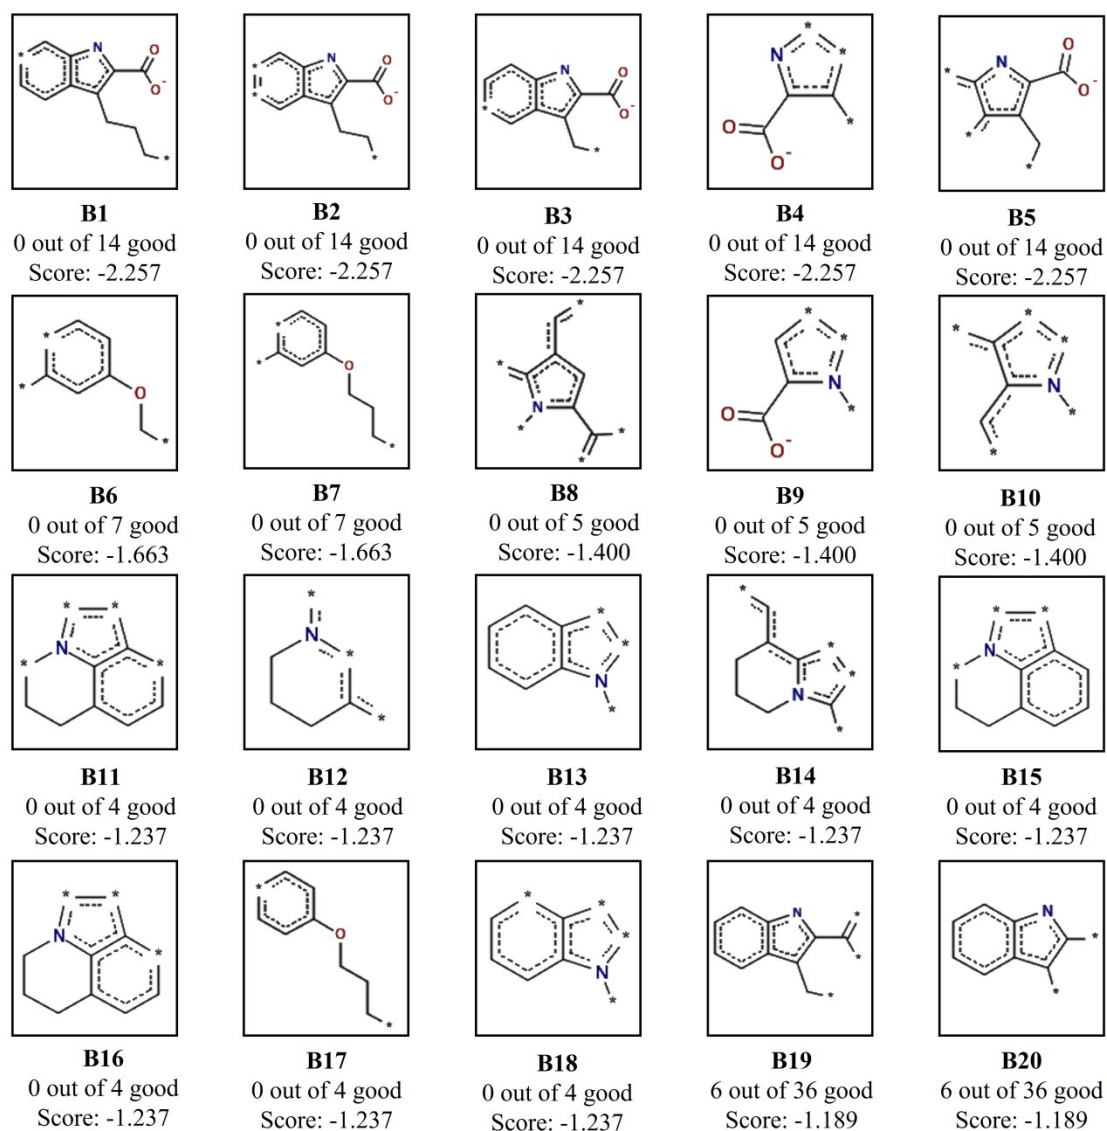

**Figure S2.** Bad molecular fingerprints (**B1-B20**) unfavourable for Mcl-1 inhibitory activity as introduced from the *ECFP\_6* fingerprint descriptor.

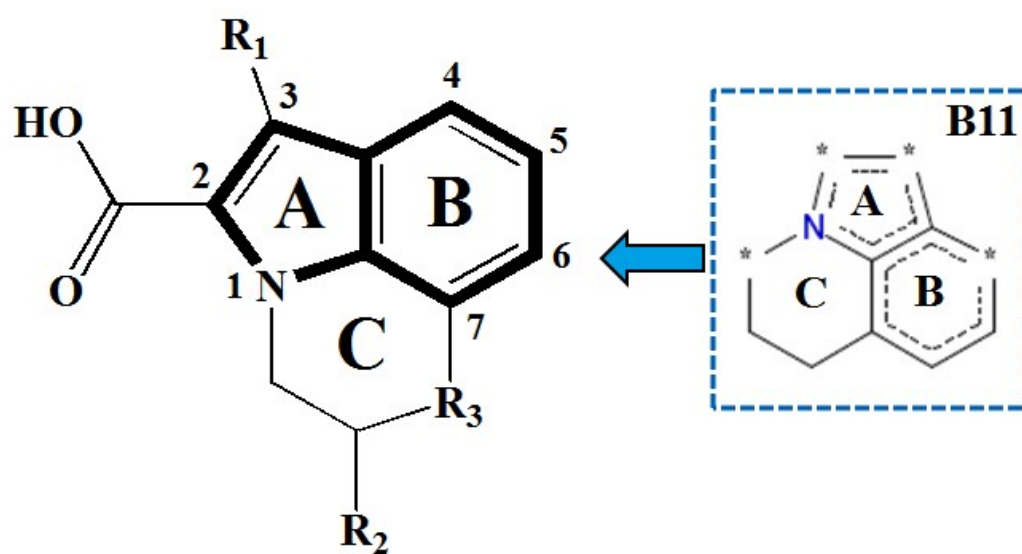

**Figure S3.** General structure of tricyclic compounds with six membered C-ring moiety and the unfavourable sub-structural fragment B11.



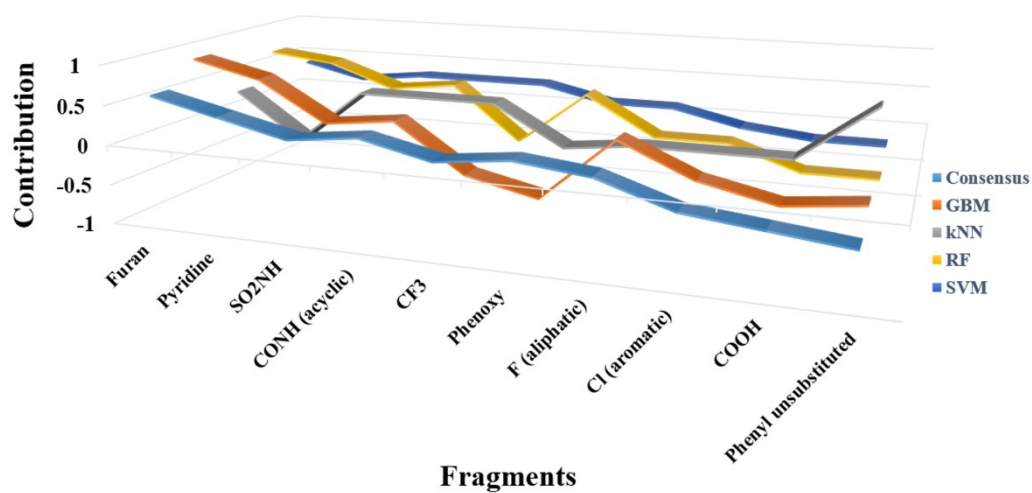

**Figure S4.** Showing top 10 positive fragments obtained from five different models crucial for Mcl-1 inhibition.

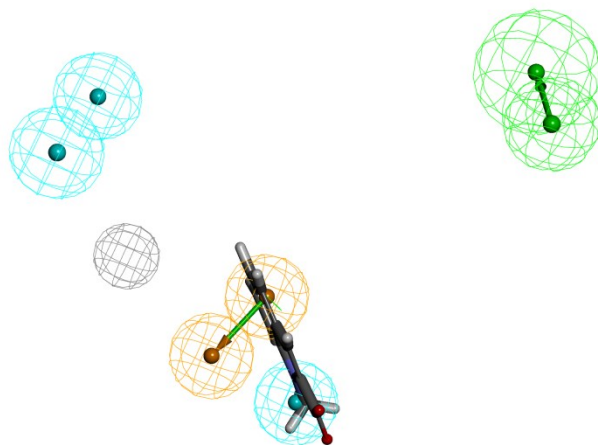

**Figure S5.** Mapping of the least active **001** on the pharmacophoric features

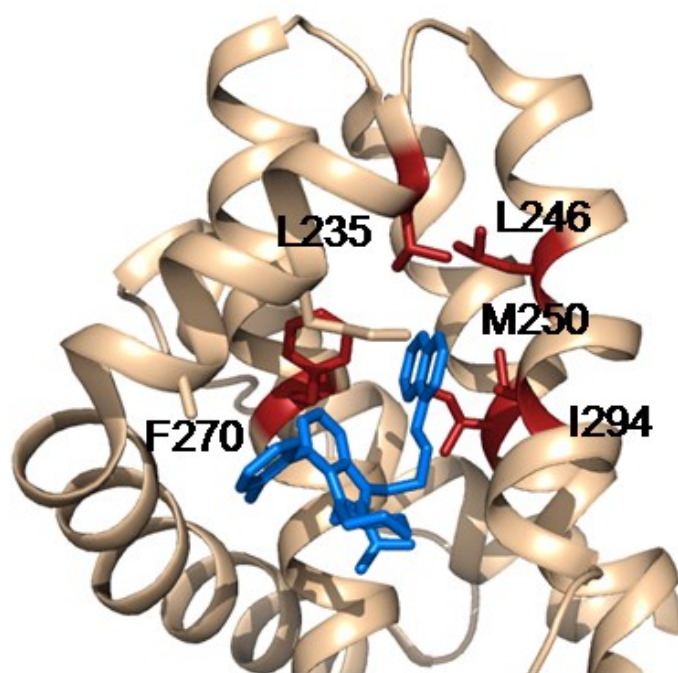

**Figure S6.** Interaction of naphthyl moiety with the active site of Mcl-1 (PDB: 6B4U).
